# Supplementary material for: Changes in Higher-Order Chromosomal Structure of Klebsiella pneumoniae Under Simulated Microgravity
Source: Front Microbiol. 2022 May 30;13:879321. doi: 10.3389/fmicb.2022.879321 (PMC9197264; doi:10.3389/fmicb.2022.879321)
Supplement: Supplementary file 6 [file Table_3.XLSX]

## Sheet: up-regulated DMRs
Supplementary Table 3 up-regulated DMRs of M1 compared with WT
chr	start	end	length	nCG	meanMethy1	meanMethy2	diff.Methy	areaStat
NC_016845.1	32361	32513	153	27	0.0131826	0.00143363	0.0117489	83.6262
NC_016845.1	98873	98982	110	12	0.0142909	0.00219101	0.0120999	41.5397
NC_016845.1	139995	140156	162	33	0.0135802	0.0021149	0.0114653	84.011
NC_016845.1	165124	165437	314	66	0.0180361	0.00514834	0.0128877	219.888
NC_016845.1	197452	197628	177	32	0.0156165	0.00325407	0.0123624	92.5995
NC_016845.1	248724	249420	697	127	0.0186054	0.00474101	0.0138643	474.811
NC_016845.1	328533	328806	274	55	0.0142576	0.00171867	0.0125389	148.861
NC_016845.1	335263	335319	57	9	0.014297	0.00279922	0.0114978	21.814
NC_016845.1	348179	348333	155	39	0.0181941	0.00342036	0.0147738	123.497
NC_016845.1	409208	409348	141	32	0.0164113	0.00451669	0.0118946	86.6565
NC_016845.1	485305	485689	385	81	0.0167859	0.00147889	0.015307	239.75
NC_016845.1	540335	540392	58	8	0.013957	0.00256095	0.0113961	27.3596
NC_016845.1	557062	557274	213	33	0.0150319	0.00263854	0.0123933	100.133
NC_016845.1	579082	579301	220	41	0.0197051	0.00751093	0.0121942	138.824
NC_016845.1	656480	656624	145	19	0.0155976	0.00192683	0.0136707	58.7226
NC_016845.1	826255	826418	164	33	0.0186431	0.00652038	0.0121227	115.036
NC_016845.1	843126	843197	72	17	0.0145441	0.00195111	0.012593	48.6633
NC_016845.1	845997	846057	61	11	0.0150085	0.00167274	0.0133358	36.0164
NC_016845.1	864220	864333	114	17	0.015475	0.00331458	0.0121604	54.6994
NC_016845.1	872936	873141	206	44	0.0161918	0.00442936	0.0117624	136.734
NC_016845.1	877135	877489	355	65	0.0161684	0.00202367	0.0141447	215.96
NC_016845.1	884054	884250	197	43	0.0183392	0.00571678	0.0126224	144.548
NC_016845.1	903583	903694	112	25	0.0134188	0.000613134	0.0128056	89.4008
NC_016845.1	1131089	1131441	353	80	0.0160646	0.00328141	0.0127832	229.28
NC_016845.1	1209775	1209890	116	29	0.0139546	0.00148796	0.0124666	92.3732
NC_016845.1	1484663	1484967	305	89	0.0191153	0.00490482	0.0142105	342.461
NC_016845.1	1662307	1662427	121	31	0.0157218	0.0036377	0.0120842	100.918
NC_016845.1	1680125	1680502	378	97	0.0225507	0.00836941	0.0141813	333.94
NC_016845.1	1753567	1753825	259	51	0.0152015	0.00318794	0.0120136	161.858
NC_016845.1	1870914	1871006	93	23	0.015934	0.00160576	0.0143282	88.1283
NC_016845.1	1942583	1942765	183	44	0.0156335	0.00394493	0.0116886	141.351
NC_016845.1	1978293	1978347	55	17	0.0179396	0.00577825	0.0121614	55.8839
NC_016845.1	1998607	1998943	337	53	0.0174128	0.00149713	0.0159157	206.367
NC_016845.1	2014100	2014373	274	57	0.0159842	0.00191248	0.0140717	169.525
NC_016845.1	2069410	2069524	115	32	0.0159375	0.0044486	0.0114889	79.7368
NC_016845.1	2108160	2108611	452	100	0.0173743	0.00276696	0.0146074	327.107
NC_016845.1	2117962	2118026	65	10	0.0170295	0.00270944	0.0143201	34.9967
NC_016845.1	2249663	2250021	359	66	0.0181904	0.00378185	0.0144086	253.561
NC_016845.1	2303762	2303991	230	50	0.0164773	0.00404457	0.0124328	165.143
NC_016845.1	2343647	2343784	138	33	0.0153996	0.00127939	0.0141202	136.075
NC_016845.1	2422174	2422642	469	100	0.0185876	0.00479488	0.0137927	343.758
NC_016845.1	2483291	2483563	273	60	0.0172018	0.00463903	0.0125627	172.701
NC_016845.1	2553669	2553855	187	41	0.0169089	0.00486988	0.012039	135.044
NC_016845.1	2709687	2709879	193	39	0.0160935	0.00287205	0.0132214	138.787
NC_016845.1	2722269	2722471	203	44	0.0162898	0.00110279	0.015187	166.961
NC_016845.1	2728618	2729006	389	107	0.0166385	0.000578693	0.0160598	303.632
NC_016845.1	2735199	2735792	594	149	0.0169847	0.00115513	0.0158296	495.647
NC_016845.1	2786793	2787006	214	51	0.01505	0.00331799	0.011732	155.908
NC_016845.1	2811081	2811230	150	44	0.0162573	0.00297525	0.013282	141.725
NC_016845.1	2811404	2811512	109	28	0.0176123	0.0024911	0.0151212	104.358
NC_016845.1	2857266	2857374	109	31	0.0180963	0.00504049	0.0130558	100.029
NC_016845.1	2915574	2915626	53	6	0.0200594	0.00286488	0.0171945	23.5825
NC_016845.1	2915741	2915821	81	12	0.014669	0.00187829	0.0127908	36.0302
NC_016845.1	2921498	2921577	80	25	0.0129861	0.00141978	0.0115663	58.3262
NC_016845.1	3024652	3025113	462	109	0.0186588	0.00350237	0.0151564	408.935
NC_016845.1	3025447	3025499	53	11	0.0203187	0.00695724	0.0133615	35.6989
NC_016845.1	3125708	3126094	387	92	0.0236974	0.0018041	0.0218933	528.737
NC_016845.1	3128725	3129188	464	115	0.0177741	0.00240256	0.0153715	382.237
NC_016845.1	3212201	3212367	167	42	0.0169767	0.00371593	0.0132608	121.838
NC_016845.1	3560673	3561270	598	60	0.0229033	0.00129769	0.0216056	218.874
NC_016845.1	3647823	3647919	97	21	0.0188702	0.00652574	0.0123444	69.3946
NC_016845.1	3694441	3694542	102	25	0.0133589	0.00152619	0.0118327	62.725
NC_016845.1	3708364	3708733	370	90	0.0167284	0.00276051	0.0139679	282.976
NC_016845.1	3812315	3812558	244	49	0.017379	0.00351777	0.0138612	158.104
NC_016845.1	3948728	3948958	231	61	0.0158151	0.0030511	0.012764	216.54
NC_016845.1	3973105	3973466	362	81	0.0154225	0.00227465	0.0131479	223.847
NC_016845.1	4154822	4154885	64	22	0.0177538	0.00465327	0.0131006	82.2426
NC_016845.1	4163491	4163667	177	36	0.0179266	0.00418078	0.0137458	132.434
NC_016845.1	4452272	4452489	218	31	0.0141728	0.0015199	0.0126529	105.322
NC_016845.1	4605107	4605166	60	11	0.0148326	0.00377526	0.0110574	25.9699
NC_016845.1	4608402	4608459	58	15	0.0152978	0.00376662	0.0115312	48.9834
NC_016845.1	4831546	4831624	79	16	0.0126096	0.00124845	0.0113611	52.9008
NC_016845.1	4844409	4844563	155	26	0.0141921	6.40748e-05	0.014128	86.1423
NC_016845.1	4877964	4878201	238	65	0.0176663	0.00531635	0.01235	223.29
NC_016845.1	4926750	4926910	161	31	0.0174213	0.00532247	0.0120989	90.9226
NC_016845.1	4932163	4932235	73	17	0.0149744	0.00313113	0.0118433	45.0746
NC_016845.1	4941679	4941798	120	16	0.0143043	0.00250064	0.0118036	42.4346
NC_016845.1	4942834	4942913	80	19	0.0143627	0.00292179	0.0114409	49.266
NC_016845.1	5008168	5008225	58	15	0.0143552	0.00369326	0.0106619	44.9682
NC_016845.1	5224097	5224262	166	45	0.0157776	0.00383682	0.0119408	136.726
NC_016845.1	5330005	5330239	235	32	0.017478	0.00308759	0.0143904	117.813

## Sheet: Overlap of up-regulated DMRs
Overlap regions of up-regulated DMRs and genes in M1
chr	start	end	diff.Methy	chr	start	end	length of overlap	GeneID	log2FoldChange
NC_016845.1	98873	98982	0.0120999	NC_016845.1	98031	98939	66	KPHS_00910	0.0892645
NC_016845.1	139995	140156	0.0114653	NC_016845.1	139244	141265	161	KPHS_01230	0.137008
NC_016845.1	165124	165437	0.0128877	NC_016845.1	164897	166093	313	KPHS_01450	-0.222193
NC_016845.1	197452	197628	0.0123624	NC_016845.1	197396	199036	176	KPHS_01760	-0.102448
NC_016845.1	248724	249420	0.0138643	NC_016845.1	248222	248893	169	KPHS_02170	-0.117078
NC_016845.1	248724	249420	0.0138643	NC_016845.1	248936	249526	484	KPHS_02180	0.0460868
NC_016845.1	328533	328806	0.0125389	NC_016845.1	327408	329168	273	KPHS_02880	-0.177026
NC_016845.1	335263	335319	0.0114978	NC_016845.1	334943	335701	56	KPHS_02950	-0.215093
NC_016845.1	348179	348333	0.0147738	NC_016845.1	347744	348625	154	KPHS_03070	-0.0128457
NC_016845.1	409208	409348	0.0118946	NC_016845.1	408207	410003	140	KPHS_03710	0.0286654
NC_016845.1	485305	485689	0.015307	NC_016845.1	485326	485697	363	KPHS_04510	-0.0980705
NC_016845.1	540335	540392	0.0113961	NC_016845.1	539534	540469	57	KPHS_05040	-0.163706
NC_016845.1	557062	557274	0.0123933	NC_016845.1	556979	558061	212	KPHS_05200	-0.214129
NC_016845.1	579082	579301	0.0121942	NC_016845.1	578981	580450	219	KPHS_05380	0.159809
NC_016845.1	656480	656624	0.0136707	NC_016845.1	656338	657000	144	KPHS_06150	-0.0795624
NC_016845.1	826255	826418	0.0121227	NC_016845.1	825431	827041	163	KPHS_07800	-0.164918
NC_016845.1	843126	843197	0.012593	NC_016845.1	842572	844143	71	KPHS_07950	0.30403
NC_016845.1	864220	864333	0.0121604	NC_016845.1	863862	864725	113	KPHS_08140	0.172282
NC_016845.1	872936	873141	0.0117624	NC_016845.1	872512	873255	205	KPHS_08230	-0.0231535
NC_016845.1	877135	877489	0.0141447	NC_016845.1	876494	877879	354	KPHS_08280	0.202274
NC_016845.1	884054	884250	0.0126224	NC_016845.1	883721	885091	196	KPHS_08350	-0.203882
NC_016845.1	903583	903694	0.0128056	NC_016845.1	903383	903625	42	KPHS_08510	0.0644911
NC_016845.1	1131089	1131441	0.0127832	NC_016845.1	1130960	1131874	352	KPHS_10750	-0.0258779
NC_016845.1	1209775	1209890	0.0124666	NC_016845.1	1209694	1210152	115	KPHS_11520	0.530181
NC_016845.1	1484663	1484967	0.0142105	NC_016845.1	1483500	1485020	304	KPHS_14320	-0.0369227
NC_016845.1	1662307	1662427	0.0120842	NC_016845.1	1661836	1662624	120	KPHS_15990	0.186257
NC_016845.1	1680125	1680502	0.0141813	NC_016845.1	1679580	1680332	207	KPHS_16210	-0.057716
NC_016845.1	1680125	1680502	0.0141813	NC_016845.1	1680329	1681267	173	KPHS_16220	-0.149435
NC_016845.1	1753567	1753825	0.0120136	NC_016845.1	1753511	1754410	258	KPHS_16920	-0.148734
NC_016845.1	1870914	1871006	0.0143282	NC_016845.1	1870811	1873093	92	KPHS_18110	-0.136232
NC_016845.1	1942583	1942765	0.0116886	NC_016845.1	1941930	1943984	182	KPHS_18700	-0.0457326
NC_016845.1	1978293	1978347	0.0121614	NC_016845.1	1977840	1978388	54	KPHS_19100	0.0315938
NC_016845.1	1998607	1998943	0.0159157	NC_016845.1	1997792	1998697	90	KPHS_19310	-0.144534
NC_016845.1	2014100	2014373	0.0140717	NC_016845.1	2014007	2015125	273	KPHS_19480	-0.144489
NC_016845.1	2069410	2069524	0.0114889	NC_016845.1	2067765	2069489	79	KPHS_20050	-0.12699
NC_016845.1	2108160	2108611	0.0146074	NC_016845.1	2108008	2109021	451	KPHS_20520	-0.121485
NC_016845.1	2117962	2118026	0.0143201	NC_016845.1	2116806	2118293	64	KPHS_20640	-0.0146984
NC_016845.1	2249663	2250021	0.0144086	NC_016845.1	2249502	2251811	358	KPHS_22050	-0.0141568
NC_016845.1	2303762	2303991	0.0124328	NC_016845.1	2303604	2304098	229	KPHS_22670	0.375207
NC_016845.1	2343647	2343784	0.0141202	NC_016845.1	2343463	2343720	73	KPHS_23120	0.967177
NC_016845.1	2343647	2343784	0.0141202	NC_016845.1	2343717	2344856	67	KPHS_23130	-0.127983
NC_016845.1	2422174	2422642	0.0137927	NC_016845.1	2421359	2423008	468	KPHS_23880	0.108061
NC_016845.1	2553669	2553855	0.012039	NC_016845.1	2553347	2554807	186	KPHS_25270	-0.364165
NC_016845.1	2722269	2722471	0.015187	NC_016845.1	2721155	2722396	127	KPHS_27110	-0.0742026
NC_016845.1	2722269	2722471	0.015187	NC_016845.1	2722412	2723149	59	KPHS_27120	0.547766
NC_016845.1	2728618	2729006	0.0160598	NC_016845.1	2728259	2728945	327	KPHS_27190	0.169894
NC_016845.1	2728618	2729006	0.0160598	NC_016845.1	2728899	2729657	107	KPHS_27200	-0.311942
NC_016845.1	2735199	2735792	0.0158296	NC_016845.1	2735187	2736461	593	KPHS_27280	-0.223197
NC_016845.1	2786793	2787006	0.011732	NC_016845.1	2786076	2787482	213	KPHS_27790	-0.187198
NC_016845.1	2811081	2811230	0.013282	NC_016845.1	2810925	2811839	149	KPHS_28080	-0.342786
NC_016845.1	2811404	2811512	0.0151212	NC_016845.1	2810925	2811839	108	KPHS_28080	-0.342786
NC_016845.1	2857266	2857374	0.0130558	NC_016845.1	2856640	2857320	54	KPHS_28540	-0.11682
NC_016845.1	2915574	2915626	0.0171945	NC_016845.1	2915338	2916006	52	KPHS_29170	0.197898
NC_016845.1	2915741	2915821	0.0127908	NC_016845.1	2915338	2916006	80	KPHS_29170	0.197898
NC_016845.1	3024652	3025113	0.0151564	NC_016845.1	3024041	3024811	159	KPHS_30370	0.122607
NC_016845.1	3024652	3025113	0.0151564	NC_016845.1	3024831	3025703	282	KPHS_30380	-0.228134
NC_016845.1	3025447	3025499	0.0133615	NC_016845.1	3024831	3025703	52	KPHS_30380	-0.228134
NC_016845.1	3125708	3126094	0.0218933	NC_016845.1	3125648	3126643	386	KPHS_31370	0.00645234
NC_016845.1	3128725	3129188	0.0153715	NC_016845.1	3127810	3128808	83	KPHS_31390	0.0763629
NC_016845.1	3128725	3129188	0.0153715	NC_016845.1	3128808	3129845	380	KPHS_31400	0.110802
NC_016845.1	3212201	3212367	0.0132608	NC_016845.1	3211935	3212723	166	KPHS_32180	0.0527344
NC_016845.1	3560673	3561270	0.0216056	NC_016845.1	3560110	3561516	597	KPHS_35590	0.0669267
NC_016845.1	3647823	3647919	0.0123444	NC_016845.1	3646974	3647891	68	KPHS_36310	-0.110043
NC_016845.1	3694441	3694542	0.0118327	NC_016845.1	3694331	3695308	101	KPHS_36720	-0.013441
NC_016845.1	3708364	3708733	0.0139679	NC_016845.1	3707140	3708897	369	KPHS_36830	-0.0753828
NC_016845.1	3812315	3812558	0.0138612	NC_016845.1	3811353	3812366	51	KPHS_37780	0.161506
NC_016845.1	3812315	3812558	0.0138612	NC_016845.1	3812430	3813566	128	KPHS_37790	0.152613
NC_016845.1	3948728	3948958	0.012764	NC_016845.1	3948547	3950016	230	KPHS_39130	-0.0286296
NC_016845.1	3973105	3973466	0.0131479	NC_016845.1	3973056	3973442	337	KPHS_39320	0.344562
NC_016845.1	4154822	4154885	0.0131006	NC_016845.1	4154511	4155953	63	KPHS_41240	0.0312674
NC_016845.1	4163491	4163667	0.0137458	NC_016845.1	4162732	4164558	176	KPHS_41330	-0.536189
NC_016845.1	4452272	4452489	0.0126529	NC_016845.1	4451891	4452484	212	KPHS_44170	-0.0552414
NC_016845.1	4452272	4452489	0.0126529	NC_016845.1	4452461	4452595	28	KPHS_44180	0.480955
NC_016845.1	4605107	4605166	0.0110574	NC_016845.1	4604757	4605548	59	KPHS_45790	-0.243657
NC_016845.1	4608402	4608459	0.0115312	NC_016845.1	4608322	4609755	57	KPHS_45850	0.235877
NC_016845.1	4831546	4831624	0.0113611	NC_016845.1	4831455	4832234	78	KPHS_48210	0.46956
NC_016845.1	4844409	4844563	0.014128	NC_016845.1	4841737	4844636	154	KPHS_r00160	1.04033
NC_016845.1	4877964	4878201	0.01235	NC_016845.1	4877856	4878242	237	KPHS_48800	0.0236441
NC_016845.1	4926750	4926910	0.0120989	NC_016845.1	4925154	4927484	160	KPHS_49290	0.00475213
NC_016845.1	4932163	4932235	0.0118433	NC_016845.1	4932047	4932685	72	KPHS_49350	0.19428
NC_016845.1	4941679	4941798	0.0118036	NC_016845.1	4940242	4942899	119	KPHS_49400	-0.240728
NC_016845.1	4942834	4942913	0.0114409	NC_016845.1	4940242	4942899	65	KPHS_49400	-0.240728
NC_016845.1	5008168	5008225	0.0106619	NC_016845.1	5007938	5009506	57	KPHS_50050	-0.606613
NC_016845.1	5224097	5224262	0.0119408	NC_016845.1	5224119	5224766	143	KPHS_52030	-0.131814
NC_016845.1	5330005	5330239	0.0143904	NC_016845.1	5329494	5330309	234	KPHS_53130	0.291663

## Sheet: down-regulated DMRs
Supplementary Table 3 down-regulated DMRs of M1 compared with WT
chr	start	end	length	nCG	meanMethy1	meanMethy2	diff.Methy	areaStat
NC_016845.1	13	78	66	12	0.00203275	0.0204083	-0.0183755	-46.5111
NC_016845.1	300	367	68	7	0.00214794	0.0147888	-0.0126409	-23.3674
NC_016845.1	463	573	111	30	0.00247613	0.0138012	-0.0113251	-85.8939
NC_016845.1	1128	1422	295	54	0.00145671	0.0136218	-0.0121651	-174.286
NC_016845.1	4652	4864	213	43	0.00198516	0.014981	-0.0129958	-134.072
NC_016845.1	16141	16290	150	22	0.00131904	0.0171967	-0.0158776	-76.1032
NC_016845.1	27430	27594	165	34	0.00286898	0.014275	-0.011406	-96.0555
NC_016845.1	33495	33904	410	80	0.00333793	0.0192144	-0.0158764	-337.235
NC_016845.1	89020	89222	203	51	0.00582841	0.0196617	-0.0138332	-181.869
NC_016845.1	111380	111631	252	70	0.00743413	0.0201358	-0.0127017	-244.539
NC_016845.1	125722	125835	114	24	0.00121912	0.0168479	-0.0156288	-91.7417
NC_016845.1	265157	265351	195	27	0.00238212	0.0156495	-0.0132674	-99.5801
NC_016845.1	277639	277718	80	9	0.00285847	0.0146058	-0.0117474	-30.3684
NC_016845.1	277952	278082	131	18	0.00217833	0.0147097	-0.0125314	-58.9372
NC_016845.1	320206	320327	122	34	0.0044013	0.017993	-0.0135917	-127.227
NC_016845.1	320391	320482	92	18	0.00572375	0.0181605	-0.0124367	-61.9276
NC_016845.1	367664	368016	353	81	0.00237356	0.0200198	-0.0176462	-358.704
NC_016845.1	372462	372817	356	77	0.00273371	0.0192465	-0.0165128	-315.394
NC_016845.1	382849	383098	250	39	0.00765165	0.0216292	-0.0139775	-130.483
NC_016845.1	388331	388814	484	103	0.00499843	0.0208126	-0.0158142	-426.863
NC_016845.1	389626	389689	64	13	0.00272815	0.0148756	-0.0121475	-32.9254
NC_016845.1	392186	392350	165	26	7.82804e-05	0.0286601	-0.0285818	-156.698
NC_016845.1	418536	418618	83	5	0.00430854	0.0194982	-0.0151896	-17.5851
NC_016845.1	442816	443267	452	95	0.00336348	0.0167769	-0.0134134	-286.633
NC_016845.1	453426	453965	540	118	0.00491995	0.0210358	-0.0161158	-498.72
NC_016845.1	457930	458402	473	111	0.00482905	0.0180451	-0.0132161	-364.571
NC_016845.1	474337	474406	70	17	0.00265767	0.0139756	-0.0113179	-40.6538
NC_016845.1	494601	494817	217	52	0.00352864	0.0179729	-0.0144443	-186.327
NC_016845.1	499929	500108	180	44	0.00456212	0.0176639	-0.0131018	-151.678
NC_016845.1	510264	510399	136	32	0.00907198	0.0230727	-0.0140007	-104.596
NC_016845.1	534762	535075	314	79	0.00334581	0.0203032	-0.0169573	-289.364
NC_016845.1	543826	543929	104	21	0.00249012	0.0141168	-0.0116267	-69.1917
NC_016845.1	545646	545779	134	27	0.00112401	0.0123817	-0.0112577	-71.1143
NC_016845.1	592027	592253	227	44	0.00348423	0.0157741	-0.0122899	-135.941
NC_016845.1	622267	622347	81	13	0.00182859	0.0132595	-0.0114309	-32.9599
NC_016845.1	623877	624252	376	69	0.00199687	0.0152413	-0.0132444	-194.204
NC_016845.1	645030	645207	178	53	0.00305376	0.0165629	-0.0135092	-173.293
NC_016845.1	657675	657725	51	8	0.00267486	0.0144591	-0.0117842	-22.5354
NC_016845.1	657810	657924	115	21	0.00323534	0.0147087	-0.0114734	-68.4175
NC_016845.1	667672	668053	382	92	0.00270204	0.0175742	-0.0148722	-381.363
NC_016845.1	679033	679192	160	44	0.00568407	0.0180301	-0.012346	-120.973
NC_016845.1	705077	705414	338	63	0.00307832	0.0179014	-0.0148231	-239.286
NC_016845.1	711635	711959	325	66	0.00354711	0.0160318	-0.0124847	-215.395
NC_016845.1	752281	752429	149	27	0.00371711	0.0161991	-0.012482	-73.9336
NC_016845.1	774934	775102	169	45	0.00311008	0.0175171	-0.014407	-138.137
NC_016845.1	781318	781450	133	21	0.00285064	0.016992	-0.0141414	-59.4017
NC_016845.1	783613	783952	340	67	0.00368459	0.0195052	-0.0158206	-259.945
NC_016845.1	816891	817710	820	193	0.00600489	0.0211063	-0.0151014	-714.361
NC_016845.1	867512	867866	355	68	0.00440999	0.0187382	-0.0143283	-225.655
NC_016845.1	909566	909761	196	44	0.00327462	0.0171476	-0.013873	-159.911
NC_016845.1	915914	916215	302	75	0.00754536	0.0193917	-0.0118463	-246.284
NC_016845.1	917893	918173	281	64	0.00375202	0.016846	-0.013094	-233.648
NC_016845.1	925929	926277	349	72	0.00322678	0.0163694	-0.0131426	-237.036
NC_016845.1	962261	962422	162	38	0.00404588	0.0172055	-0.0131596	-130.617
NC_016845.1	962934	962984	51	11	0.00307719	0.0145701	-0.0114929	-26.6307
NC_016845.1	1023683	1023808	126	30	0.00219486	0.0136676	-0.0114727	-89.2799
NC_016845.1	1047211	1047287	77	14	0.0022376	0.0136005	-0.0113629	-46.8906
NC_016845.1	1065775	1065918	144	30	0.00263043	0.0152303	-0.0125999	-97.8176
NC_016845.1	1066041	1066097	57	10	0.00135032	0.020594	-0.0192437	-45.7253
NC_016845.1	1108330	1108580	251	56	0.00482452	0.0163914	-0.0115669	-159.317
NC_016845.1	1121674	1121762	89	16	0.000773189	0.0130549	-0.0122818	-52.5797
NC_016845.1	1167155	1167456	302	61	0.00467394	0.0189142	-0.0142403	-194.115
NC_016845.1	1198576	1198788	213	49	0.00365085	0.0165442	-0.0128934	-169.481
NC_016845.1	1205861	1206102	242	54	0.00194333	0.0145382	-0.0125949	-146.689
NC_016845.1	1207734	1207999	266	51	0.00557559	0.0190709	-0.0134954	-172.141
NC_016845.1	1232823	1232904	82	21	0.00264343	0.0143272	-0.0116838	-55.2328
NC_016845.1	1236178	1236232	55	15	0.00179189	0.012817	-0.0110251	-37.7353
NC_016845.1	1236286	1236381	96	20	0.00242205	0.0155922	-0.0131701	-55.5619
NC_016845.1	1236509	1236631	123	33	0.00270622	0.015374	-0.0126677	-84.8644
NC_016845.1	1239958	1240113	156	21	0.00182285	0.0154872	-0.0136643	-80.1394
NC_016845.1	1288182	1288284	103	23	0.00207382	0.0146241	-0.0125503	-66.0886
NC_016845.1	1302288	1302682	395	57	0.00100313	0.0171377	-0.0161345	-219.802
NC_016845.1	1338589	1338644	56	8	0.00183326	0.0189338	-0.0171005	-32.7356
NC_016845.1	1448987	1449407	421	55	0.00166012	0.0156224	-0.0139623	-177.05
NC_016845.1	1450179	1450460	282	66	0.00401098	0.0174605	-0.0134495	-250.488
NC_016845.1	1482478	1482675	198	56	0.00421598	0.015725	-0.011509	-150.427
NC_016845.1	1498694	1499163	470	113	0.00678066	0.0203156	-0.0135349	-423.134
NC_016845.1	1509373	1509789	417	68	0.00188766	0.0164555	-0.0145678	-247.689
NC_016845.1	1536141	1536348	208	36	0.00426169	0.0181363	-0.0138747	-137.318
NC_016845.1	1548188	1548556	369	59	0.00197241	0.0169212	-0.0149488	-243.387
NC_016845.1	1554336	1554676	341	70	0.00358705	0.0164144	-0.0128274	-190.302
NC_016845.1	1571876	1572194	319	73	0.00282874	0.0164169	-0.0135881	-209.483
NC_016845.1	1612455	1612717	263	78	0.00957279	0.0237571	-0.0141844	-265.081
NC_016845.1	1619355	1619542	188	39	0.00444913	0.0167948	-0.0123457	-120.722
NC_016845.1	1623854	1623927	74	13	0.00362399	0.0156504	-0.0120264	-34.461
NC_016845.1	1630239	1630563	325	87	0.00323672	0.0176787	-0.0144419	-261.864
NC_016845.1	1631947	1632212	266	67	0.00612747	0.0198107	-0.0136833	-210.173
NC_016845.1	1646188	1646512	325	74	0.00251428	0.018185	-0.0156707	-290.437
NC_016845.1	1663481	1663626	146	34	0.00236812	0.0138923	-0.0115242	-83.0766
NC_016845.1	1665620	1665710	91	22	0.00343194	0.0152831	-0.0118512	-63.053
NC_016845.1	1676330	1676686	357	77	0.00288255	0.0164254	-0.0135429	-239.004
NC_016845.1	1723373	1723551	179	37	0.00411021	0.0158688	-0.0117586	-114.746
NC_016845.1	1741501	1741710	210	52	0.00247662	0.0158085	-0.0133319	-173.494
NC_016845.1	1761449	1761535	87	20	0.00440624	0.016143	-0.0117367	-67.9572
NC_016845.1	1765047	1765098	52	13	0.00263189	0.0136344	-0.0110026	-35.3137
NC_016845.1	1769154	1769219	66	9	0.00051703	0.0132515	-0.0127345	-30.4964
NC_016845.1	1774350	1774490	141	24	0.00334175	0.0177324	-0.0143907	-88.6298
NC_016845.1	1775244	1775468	225	52	0.00331792	0.017881	-0.014563	-196.276
NC_016845.1	1777235	1777364	130	28	0.00489956	0.016754	-0.0118544	-90.9031
NC_016845.1	1826305	1826485	181	41	0.00281477	0.0168781	-0.0140633	-159.487
NC_016845.1	1856876	1857068	193	36	0.00618551	0.0182627	-0.0120772	-107.611
NC_016845.1	1912065	1912469	405	64	0.00270523	0.0168183	-0.0141131	-251.927
NC_016845.1	1952395	1952577	183	39	0.00253924	0.014473	-0.0119338	-106.04
NC_016845.1	1960564	1960857	294	66	0.00279737	0.0176943	-0.0148969	-221.188
NC_016845.1	1987541	1987676	136	35	0.00416239	0.0159661	-0.0118037	-105.026
NC_016845.1	1999124	1999528	405	72	0.0053334	0.029955	-0.0246216	-334.837
NC_016845.1	2004751	2004890	140	29	0.00435658	0.0170096	-0.012653	-95.4077
NC_016845.1	2029173	2029429	257	25	0.00233466	0.0180984	-0.0157637	-95.0419
NC_016845.1	2055801	2055999	199	47	0.00338375	0.0164781	-0.0130943	-140.708
NC_016845.1	2062784	2062868	85	15	0.00205757	0.0150315	-0.012974	-44.9963
NC_016845.1	2075660	2075885	226	49	0.00247544	0.0162464	-0.0137709	-181.936
NC_016845.1	2123319	2123523	205	59	0.00296211	0.0172263	-0.0142642	-183.539
NC_016845.1	2127718	2127797	80	13	0.00109868	0.0138944	-0.0127957	-34.9239
NC_016845.1	2147183	2147604	422	86	0.00400162	0.0172904	-0.0132888	-312.759
NC_016845.1	2167918	2168322	405	71	0.00209366	0.0174395	-0.0153458	-268.113
NC_016845.1	2183805	2184177	373	88	0.00310379	0.0160724	-0.0129687	-254.903
NC_016845.1	2194088	2194213	126	25	0.00541508	0.0186958	-0.0132807	-85.3849
NC_016845.1	2194983	2195086	104	26	0.00456233	0.016074	-0.0115117	-77.0253
NC_016845.1	2237440	2237649	210	40	0.00332426	0.0168812	-0.0135569	-145.777
NC_016845.1	2239033	2239504	472	101	0.00281039	0.0177566	-0.0149462	-327.768
NC_016845.1	2285747	2286109	363	68	0.00308076	0.0165596	-0.0134788	-240.338
NC_016845.1	2352030	2352434	405	91	0.00489249	0.0194625	-0.01457	-352.614
NC_016845.1	2367199	2367462	264	53	0.001983	0.0168291	-0.0148461	-198.307
NC_016845.1	2383473	2383814	342	63	0.00302104	0.0168333	-0.0138122	-226.35
NC_016845.1	2419325	2419777	453	108	0.00594034	0.0199099	-0.0139696	-388.527
NC_016845.1	2445672	2446007	336	84	0.00255011	0.0191294	-0.0165793	-323.379
NC_016845.1	2468075	2468334	260	56	0.00254533	0.0158451	-0.0132997	-187.753
NC_016845.1	2475854	2476073	220	48	0.0016283	0.017858	-0.0162297	-177.624
NC_016845.1	2476127	2476494	368	71	0.00297926	0.0205177	-0.0175384	-281.537
NC_016845.1	2490470	2490600	131	30	0.00722212	0.0196266	-0.0124045	-96.8985
NC_016845.1	2520923	2521371	449	109	0.00522033	0.0198883	-0.014668	-434.034
NC_016845.1	2557883	2558245	363	61	0.00129539	0.0196888	-0.0183934	-289.576
NC_016845.1	2572423	2572808	386	69	0.00174125	0.0161	-0.0143588	-239.196
NC_016845.1	2597067	2597152	86	18	0.00301392	0.0171498	-0.0141359	-60.4258
NC_016845.1	2601755	2601900	146	38	0.00278401	0.0152966	-0.0125126	-122.186
NC_016845.1	2605349	2605697	349	79	0.00473152	0.0196621	-0.0149306	-314.944
NC_016845.1	2616870	2617046	177	32	0.00193526	0.0146873	-0.012752	-99.307
NC_016845.1	2653636	2654082	447	93	0.00249967	0.016957	-0.0144574	-329.808
NC_016845.1	2655150	2655200	51	9	0.00149545	0.013185	-0.0116896	-24.7695
NC_016845.1	2673705	2673799	95	12	0.000957071	0.0134148	-0.0124578	-40.926
NC_016845.1	2679674	2679744	71	16	0.000847982	0.0146219	-0.0137739	-56.7938
NC_016845.1	2688900	2689378	479	80	0.00091014	0.0155447	-0.0146346	-254.103
NC_016845.1	2714943	2715242	300	63	0.00438396	0.0171803	-0.0127964	-208.776
NC_016845.1	2726118	2726304	187	41	0.00198177	0.0172348	-0.015253	-133.494
NC_016845.1	2727312	2727814	503	106	0.00166167	0.0186791	-0.0170174	-434.248
NC_016845.1	2777706	2778182	477	99	0.00316945	0.0225484	-0.0193789	-511.547
NC_016845.1	2814877	2815069	193	36	0.00255773	0.0146054	-0.0120477	-106.864
NC_016845.1	2823675	2823978	304	61	0.00143896	0.0147216	-0.0132826	-202.77
NC_016845.1	2843344	2843656	313	65	0.0041721	0.0176471	-0.013475	-232.374
NC_016845.1	2845425	2845618	194	42	0.00208883	0.0159201	-0.0138313	-130.419
NC_016845.1	2848801	2849098	298	60	0.00371085	0.0170942	-0.0133833	-221.877
NC_016845.1	2851588	2851935	348	73	0.00398927	0.0207778	-0.0167885	-313.877
NC_016845.1	2854638	2854707	70	21	0.00523116	0.0164158	-0.0111846	-60.5458
NC_016845.1	2872835	2872928	94	32	0.00327106	0.0159082	-0.0126372	-103.12
NC_016845.1	2897829	2898027	199	49	0.00441532	0.0167673	-0.0123519	-163.708
NC_016845.1	2909082	2909455	374	71	0.00381655	0.015682	-0.0118655	-210.646
NC_016845.1	2909696	2910015	320	60	0.00317	0.0155133	-0.0123433	-178.741
NC_016845.1	2910112	2910241	130	31	0.00304354	0.0150924	-0.0120488	-87.1376
NC_016845.1	2914802	2915134	333	69	0.0044242	0.020853	-0.0164288	-266.599
NC_016845.1	2940458	2940916	459	76	0.00307727	0.0193287	-0.0162514	-322.462
NC_016845.1	2958822	2958980	159	34	0.0032137	0.0156752	-0.0124615	-105.443
NC_016845.1	2959031	2959114	84	17	0.00409181	0.0159595	-0.0118677	-41.0242
NC_016845.1	2997382	2997911	530	103	0.00177775	0.0211131	-0.0193353	-521.904
NC_016845.1	3006536	3006796	261	41	0.00174611	0.015441	-0.0136949	-137.066
NC_016845.1	3056470	3056725	256	66	0.00282403	0.0155571	-0.0127331	-200.5
NC_016845.1	3061044	3061240	197	40	0.00345031	0.0168186	-0.0133683	-117.411
NC_016845.1	3111408	3111643	236	68	0.00573903	0.018607	-0.0128679	-237.848
NC_016845.1	3112328	3112412	85	21	0.00186774	0.0136038	-0.0117361	-49.5253
NC_016845.1	3140549	3140700	152	20	0.0012825	0.01412	-0.0128375	-60.703
NC_016845.1	3152451	3152745	295	51	0.00321658	0.0166803	-0.0134637	-188.883
NC_016845.1	3175601	3175707	107	27	0.00271249	0.0145989	-0.0118864	-90.0459
NC_016845.1	3176894	3177035	142	21	0.00128761	0.0131417	-0.0118541	-52.4559
NC_016845.1	3181496	3181700	205	40	0.00200147	0.0142683	-0.0122668	-100.696
NC_016845.1	3183354	3183673	320	59	0.00364022	0.0189091	-0.0152689	-236.549
NC_016845.1	3191184	3191512	329	60	0.00131973	0.0144767	-0.013157	-191.594
NC_016845.1	3192014	3192278	265	56	0.00215497	0.0169066	-0.0147516	-189.843
NC_016845.1	3257145	3257647	503	88	0.00166181	0.0170824	-0.0154205	-306.918
NC_016845.1	3277957	3278378	422	73	0.00180983	0.0167811	-0.0149712	-265.313
NC_016845.1	3283667	3283750	84	13	0.00494154	0.0178073	-0.0128658	-44.1436
NC_016845.1	3287257	3287688	432	81	0.00322759	0.0175005	-0.0142729	-272.549
NC_016845.1	3312519	3312749	231	52	0.00469832	0.0171716	-0.0124733	-173.117
NC_016845.1	3329150	3329292	143	39	0.00273811	0.015299	-0.0125609	-108.528
NC_016845.1	3339567	3339935	369	84	0.00347427	0.0175145	-0.0140402	-299.853
NC_016845.1	3341707	3341919	213	52	0.00356811	0.0162173	-0.0126492	-148.62
NC_016845.1	3356270	3356328	59	11	0.00226677	0.0138834	-0.0116166	-37.2024
NC_016845.1	3371512	3371896	385	87	0.00524355	0.02041	-0.0151665	-350.709
NC_016845.1	3420070	3420601	532	106	0.00331829	0.0179589	-0.0146406	-430.688
NC_016845.1	3495725	3495947	223	39	0.00181972	0.0168352	-0.0150155	-153.805
NC_016845.1	3530190	3530271	82	24	0.00350299	0.0155534	-0.0120504	-72.6099
NC_016845.1	3579990	3580465	476	86	0.00276988	0.0179606	-0.0151907	-304.702
NC_016845.1	3589627	3589953	327	85	0.00644019	0.0204545	-0.0140143	-328.23
NC_016845.1	3594747	3594903	157	28	0.00199305	0.0153637	-0.0133706	-88.039
NC_016845.1	3599407	3599471	65	17	0.00269027	0.0150741	-0.0123839	-50.9447
NC_016845.1	3640035	3640372	338	84	0.00440889	0.0207535	-0.0163446	-362.143
NC_016845.1	3640429	3640531	103	31	0.00348951	0.0182311	-0.0147416	-96.3417
NC_016845.1	3646204	3646524	321	67	0.00333862	0.0163652	-0.0130265	-209.18
NC_016845.1	3655158	3655264	107	31	0.00237877	0.0136174	-0.0112386	-74.1123
NC_016845.1	3681428	3682113	686	148	0.00277878	0.0244074	-0.0216286	-833.363
NC_016845.1	3695854	3696142	289	52	0.000523545	0.0176626	-0.0171391	-220.727
NC_016845.1	3696581	3697069	489	82	0.00290849	0.0189733	-0.0160648	-334.393
NC_016845.1	3700926	3700989	64	18	0.00212614	0.0130933	-0.0109672	-42.2752
NC_016845.1	3719070	3719345	276	62	0.00199585	0.0154002	-0.0134044	-176.058
NC_016845.1	3765793	3766098	306	55	0.00338039	0.0166077	-0.0132274	-185.052
NC_016845.1	3778886	3779042	157	31	0.00300015	0.0150713	-0.0120712	-96.2801
NC_016845.1	3810140	3810437	298	57	0.00256409	0.0150467	-0.0124826	-197.209
NC_016845.1	3813655	3813707	53	9	0.00357808	0.014804	-0.0112259	-28.8381
NC_016845.1	3830686	3830900	215	31	0.00139134	0.0133781	-0.0119867	-76.6382
NC_016845.1	3842835	3842913	79	25	0.00341924	0.0149008	-0.0114815	-58.4925
NC_016845.1	3849417	3849557	141	20	0.00131591	0.0132211	-0.0119052	-49.3754
NC_016845.1	3891240	3891359	120	19	0.00214535	0.0179601	-0.0158148	-71.5889
NC_016845.1	3891432	3891673	242	64	0.00519918	0.0197677	-0.0145686	-257.284
NC_016845.1	3892937	3893292	356	86	0.00661005	0.0196987	-0.0130886	-286.98
NC_016845.1	3901854	3902240	387	77	0.00241775	0.0202406	-0.0178229	-353.749
NC_016845.1	3906318	3906703	386	78	0.00231615	0.0171761	-0.0148599	-287.214
NC_016845.1	3931397	3931546	150	35	0.00214611	0.0157623	-0.0136162	-97.0467
NC_016845.1	3938412	3938923	512	101	0.00231579	0.0161966	-0.0138808	-338.116
NC_016845.1	3939467	3939568	102	17	0.00304616	0.0144071	-0.011361	-55.5201
NC_016845.1	3944068	3944323	256	42	0.00290958	0.0150412	-0.0121316	-139.326
NC_016845.1	3991505	3991752	248	48	0.000913891	0.0161376	-0.0152237	-205.953
NC_016845.1	3991820	3991934	115	22	0.00145819	0.0153934	-0.0139352	-63.9636
NC_016845.1	4007871	4007969	99	25	0.0051358	0.0166111	-0.0114753	-77.535
NC_016845.1	4026503	4026711	209	31	0.00290696	0.0170996	-0.0141927	-121.283
NC_016845.1	4049657	4049864	208	29	0.00103696	0.0153157	-0.0142788	-112.051
NC_016845.1	4092303	4092397	95	13	0.00197647	0.0129304	-0.0109539	-30.3686
NC_016845.1	4095169	4095225	57	12	0.00382607	0.0163727	-0.0125466	-40.5466
NC_016845.1	4120511	4120828	318	59	0.00336646	0.0153204	-0.0119539	-154.278
NC_016845.1	4170221	4170623	403	91	0.00274817	0.0291118	-0.0263637	-512.606
NC_016845.1	4176131	4177013	883	151	0.00183346	0.0212483	-0.0194148	-731.779
NC_016845.1	4182792	4182958	167	50	0.00351456	0.0153956	-0.011881	-146.464
NC_016845.1	4185105	4185227	123	35	0.0025144	0.0157466	-0.0132322	-94.1526
NC_016845.1	4188851	4189108	258	62	0.00184679	0.017352	-0.0155053	-219.131
NC_016845.1	4208185	4208401	217	40	0.00238639	0.0144077	-0.0120213	-131.865
NC_016845.1	4225747	4225848	102	12	0.00175002	0.0147705	-0.0130205	-42.7551
NC_016845.1	4349034	4349111	78	27	0.00336605	0.015188	-0.011822	-67.3927
NC_016845.1	4350113	4350279	167	25	0.00301436	0.0162966	-0.0132823	-87.1186
NC_016845.1	4358758	4358999	242	51	0.00289379	0.0159215	-0.0130277	-177.758
NC_016845.1	4385139	4385282	144	23	0.00125495	0.0137099	-0.0124549	-72.0994
NC_016845.1	4428673	4429162	490	96	0.00299127	0.0162511	-0.0132598	-331.423
NC_016845.1	4429232	4429390	159	29	0.00191945	0.0139084	-0.011989	-99.6518
NC_016845.1	4450423	4450475	53	5	0.00344715	0.0144199	-0.0109727	-12.3845
NC_016845.1	4454575	4454784	210	44	0.00161113	0.0168295	-0.0152183	-166.218
NC_016845.1	4454864	4455046	183	37	0.00121927	0.0189424	-0.0177231	-142.019
NC_016845.1	4463429	4463938	510	125	0.00526947	0.0180446	-0.0127751	-350.52
NC_016845.1	4474066	4474305	240	62	0.00369996	0.0152209	-0.0115209	-165.936
NC_016845.1	4475733	4475837	105	25	0.00262183	0.0141424	-0.0115205	-81.0375
NC_016845.1	4538819	4538907	89	14	0.00301827	0.0155111	-0.0124928	-48.1076
NC_016845.1	4557963	4558396	434	75	0.00212862	0.0186963	-0.0165676	-335.511
NC_016845.1	4581752	4581855	104	24	0.00168398	0.0129682	-0.0112842	-76.4538
NC_016845.1	4590003	4590174	172	43	0.00287715	0.0154144	-0.0125373	-111.756
NC_016845.1	4591950	4592178	229	50	0.00411584	0.0165269	-0.012411	-128.084
NC_016845.1	4598902	4598959	58	18	0.0031807	0.0142846	-0.0111039	-42.7376
NC_016845.1	4625905	4626129	225	56	0.0029007	0.0169149	-0.0140143	-163.485
NC_016845.1	4679404	4679925	522	103	0.00259356	0.0173676	-0.014774	-340.372
NC_016845.1	4708111	4708284	174	34	0.00316796	0.0167046	-0.0135366	-120.864
NC_016845.1	4714851	4714939	89	19	0.0053306	0.0174205	-0.0120899	-64.8592
NC_016845.1	4771422	4771587	166	38	0.00458868	0.016425	-0.0118363	-106.704
NC_016845.1	4795820	4796268	449	83	0.00133555	0.0151465	-0.013811	-229.14
NC_016845.1	4814168	4814424	257	55	0.00387923	0.0190251	-0.0151459	-204.06
NC_016845.1	4884901	4885025	125	35	0.00378741	0.0157762	-0.0119887	-84.1796
NC_016845.1	4895917	4896150	234	38	0.00345881	0.0157028	-0.012244	-121.765
NC_016845.1	4907641	4907854	214	32	0.00361677	0.0161008	-0.0124841	-108.513
NC_016845.1	4974552	4974902	351	64	0.00452368	0.0184269	-0.0139032	-233.25
NC_016845.1	5000721	5000997	277	51	0.00270733	0.0157033	-0.012996	-156.843
NC_016845.1	5027577	5027947	371	66	0.00351698	0.0161156	-0.0125986	-230.7
NC_016845.1	5036568	5036901	334	74	0.00475997	0.0209397	-0.0161798	-324.817
NC_016845.1	5057042	5057299	258	66	0.00512576	0.017078	-0.0119522	-212.876
NC_016845.1	5086362	5086661	300	68	0.0047846	0.0171366	-0.012352	-183.914
NC_016845.1	5091930	5092022	93	27	0.0050851	0.0165441	-0.011459	-79.1738
NC_016845.1	5146098	5146363	266	51	0.00290436	0.0160258	-0.0131214	-173.057
NC_016845.1	5182136	5182242	107	20	0.00288878	0.015032	-0.0121433	-63.0757
NC_016845.1	5211135	5211262	128	28	0.00265356	0.0155115	-0.0128579	-86.6013
NC_016845.1	5220598	5220774	177	34	0.00504563	0.0178356	-0.0127899	-103.799
NC_016845.1	5223096	5223359	264	50	0.0035779	0.0171556	-0.0135777	-181.28
NC_016845.1	5243103	5243297	195	45	0.00248776	0.0148888	-0.012401	-121.188
NC_016845.1	5246829	5247029	201	34	0.00185075	0.0148032	-0.0129524	-95.0306
NC_016845.1	5249066	5249193	128	30	0.00307897	0.0152054	-0.0121264	-84.5516
NC_016845.1	5278492	5278552	61	12	0.00141425	0.0131373	-0.011723	-39.5312
NC_016845.1	5289911	5290540	630	108	0.00166197	0.0173481	-0.0156861	-423.75
NC_016845.1	5327988	5328210	223	34	0.00176365	0.0143641	-0.0126005	-108.74
NC_016845.1	5329075	5329561	487	61	0.00212909	0.0195151	-0.017386	-250.085

## Sheet: Overlap of down-regulated DMRs
Overlap regions of down-regulated DMRs and genes in M1
chr	start	end	diff.Methy	chr	start	end	length of overlap	GeneID	log2FoldChange
NC_016845.1	463	573	-0.0113251	NC_016845.1	382	822	110	KPHS_00010	0.288697
NC_016845.1	1128	1422	-0.0121651	NC_016845.1	922	1380	252	KPHS_00020	-0.266375
NC_016845.1	4652	4864	-0.0129958	NC_016845.1	3973	5472	212	KPHS_00050	0.0837596
NC_016845.1	16141	16290	-0.0158776	NC_016845.1	16189	17714	101	KPHS_r00230	1.10115
NC_016845.1	27430	27594	-0.011406	NC_016845.1	25973	28651	164	KPHS_00210	-0.0899664
NC_016845.1	33495	33904	-0.0158764	NC_016845.1	32540	33949	409	KPHS_00250	0.0353032
NC_016845.1	89020	89222	-0.0138332	NC_016845.1	87782	89977	202	KPHS_00830	0.14212
NC_016845.1	111380	111631	-0.0127017	NC_016845.1	110937	112310	251	KPHS_01020	-0.145012
NC_016845.1	265157	265351	-0.0132674	NC_016845.1	264590	266191	194	KPHS_02290	-0.312492
NC_016845.1	277639	277718	-0.0117474	NC_016845.1	276872	278104	79	KPHS_02360	0.023621
NC_016845.1	277952	278082	-0.0125314	NC_016845.1	276872	278104	130	KPHS_02360	0.023621
NC_016845.1	320206	320327	-0.0135917	NC_016845.1	318591	321416	121	KPHS_02820	-0.189126
NC_016845.1	320391	320482	-0.0124367	NC_016845.1	318591	321416	91	KPHS_02820	-0.189126
NC_016845.1	367664	368016	-0.0176462	NC_016845.1	367748	368755	268	KPHS_03280	-0.19868
NC_016845.1	372462	372817	-0.0165128	NC_016845.1	372497	374782	320	KPHS_03320	0.649117
NC_016845.1	382849	383098	-0.0139775	NC_016845.1	382181	382906	57	KPHS_03430	-0.0281828
NC_016845.1	382849	383098	-0.0139775	NC_016845.1	383062	383661	36	KPHS_03440	-0.260123
NC_016845.1	388331	388814	-0.0158142	NC_016845.1	387335	388687	356	KPHS_03480	-0.0674735
NC_016845.1	388331	388814	-0.0158142	NC_016845.1	388781	390196	33	KPHS_03490	0.255176
NC_016845.1	389626	389689	-0.0121475	NC_016845.1	388781	390196	63	KPHS_03490	0.255176
NC_016845.1	392186	392350	-0.0285818	NC_016845.1	391975	392760	164	KPHS_03530	-0.0515624
NC_016845.1	418536	418618	-0.0151896	NC_016845.1	418275	419138	82	KPHS_03820	0.283865
NC_016845.1	442816	443267	-0.0134134	NC_016845.1	442723	443685	451	KPHS_04040	-0.0141264
NC_016845.1	453426	453965	-0.0161158	NC_016845.1	452067	453614	188	KPHS_04140	0.0908244
NC_016845.1	453426	453965	-0.0161158	NC_016845.1	453652	454557	313	KPHS_04150	0.166501
NC_016845.1	457930	458402	-0.0132161	NC_016845.1	457645	458649	472	KPHS_04190	-0.193787
NC_016845.1	474337	474406	-0.0113179	NC_016845.1	474112	474798	69	KPHS_04380	-0.0928253
NC_016845.1	494601	494817	-0.0144443	NC_016845.1	494065	497841	216	KPHS_04590	-0.0847325
NC_016845.1	499929	500108	-0.0131018	NC_016845.1	499548	500735	179	KPHS_04620	-0.180108
NC_016845.1	510264	510399	-0.0140007	NC_016845.1	509577	510785	135	KPHS_04720	0.596561
NC_016845.1	534762	535075	-0.0169573	NC_016845.1	534412	535359	313	KPHS_05000	0.439751
NC_016845.1	543826	543929	-0.0116267	NC_016845.1	543411	544976	103	KPHS_05090	0.219865
NC_016845.1	545646	545779	-0.0112577	NC_016845.1	545033	546451	133	KPHS_05100	0.278634
NC_016845.1	592027	592253	-0.0122899	NC_016845.1	591147	593480	226	KPHS_05530	0.0581441
NC_016845.1	622267	622347	-0.0114309	NC_016845.1	620929	622314	47	KPHS_05840	0.158477
NC_016845.1	622267	622347	-0.0114309	NC_016845.1	622281	622421	66	KPHS_05850	0.406982
NC_016845.1	623877	624252	-0.0132444	NC_016845.1	623159	624592	375	KPHS_05870	0.221887
NC_016845.1	645030	645207	-0.0135092	NC_016845.1	644446	645228	177	KPHS_06010	-0.0227231
NC_016845.1	657675	657725	-0.0117842	NC_016845.1	657048	657863	50	KPHS_06160	-0.386557
NC_016845.1	657810	657924	-0.0114734	NC_016845.1	657048	657863	53	KPHS_06160	-0.386557
NC_016845.1	667672	668053	-0.0148722	NC_016845.1	667454	669016	381	KPHS_06260	-0.35889
NC_016845.1	679033	679192	-0.012346	NC_016845.1	678641	679657	159	KPHS_06400	-0.0795859
NC_016845.1	705077	705414	-0.0148231	NC_016845.1	704906	705397	320	KPHS_06640	-0.0416417
NC_016845.1	711635	711959	-0.0124847	NC_016845.1	711396	712070	324	KPHS_06730	0.278761
NC_016845.1	752281	752429	-0.012482	NC_016845.1	751932	752861	148	KPHS_07130	0.46442
NC_016845.1	774934	775102	-0.014407	NC_016845.1	774752	775666	168	KPHS_07350	-0.193642
NC_016845.1	781318	781450	-0.0141414	NC_016845.1	780164	781465	132	KPHS_07400	0.402743
NC_016845.1	783613	783952	-0.0158206	NC_016845.1	783679	785019	273	KPHS_07430	-0.0490487
NC_016845.1	816891	817710	-0.0151014	NC_016845.1	816092	818449	819	KPHS_07720	-0.313107
NC_016845.1	867512	867866	-0.0143283	NC_016845.1	867380	867535	23	KPHS_08180	-0.0942022
NC_016845.1	867512	867866	-0.0143283	NC_016845.1	867512	868216	354	KPHS_08170	-0.00597384
NC_016845.1	909566	909761	-0.013873	NC_016845.1	908487	910877	195	KPHS_08580	-0.242681
NC_016845.1	915914	916215	-0.0118463	NC_016845.1	914840	916093	179	KPHS_08650	-0.252021
NC_016845.1	915914	916215	-0.0118463	NC_016845.1	916129	916506	86	KPHS_08660	0.311232
NC_016845.1	917893	918173	-0.013094	NC_016845.1	917468	918259	280	KPHS_08680	0.127843
NC_016845.1	925929	926277	-0.0131426	NC_016845.1	925674	926474	348	KPHS_08760	0.444165
NC_016845.1	962261	962422	-0.0131596	NC_016845.1	961820	963031	161	KPHS_09110	-0.402676
NC_016845.1	962934	962984	-0.0114929	NC_016845.1	961820	963031	50	KPHS_09110	-0.402676
NC_016845.1	1023683	1023808	-0.0114727	NC_016845.1	1023472	1024212	125	KPHS_09640	-0.0070572
NC_016845.1	1065775	1065918	-0.0125999	NC_016845.1	1064223	1066556	143	KPHS_10020	0.241926
NC_016845.1	1066041	1066097	-0.0192437	NC_016845.1	1064223	1066556	56	KPHS_10020	0.241926
NC_016845.1	1108330	1108580	-0.0115669	NC_016845.1	1107731	1108693	250	KPHS_10490	0.785287
NC_016845.1	1121674	1121762	-0.0122818	NC_016845.1	1121620	1122819	88	KPHS_10630	-0.0407969
NC_016845.1	1167155	1167456	-0.0142403	NC_016845.1	1166904	1167878	301	KPHS_11110	-0.168601
NC_016845.1	1198576	1198788	-0.0128934	NC_016845.1	1197542	1198816	212	KPHS_11410	0.0677335
NC_016845.1	1205861	1206102	-0.0125949	NC_016845.1	1205835	1207535	241	KPHS_11490	-0.14122
NC_016845.1	1207734	1207999	-0.0134954	NC_016845.1	1207663	1208481	265	KPHS_11500	-0.00199905
NC_016845.1	1232823	1232904	-0.0116838	NC_016845.1	1230832	1232889	66	KPHS_11740	0.126788
NC_016845.1	1236178	1236232	-0.0110251	NC_016845.1	1236134	1236397	54	KPHS_11790	-0.404208
NC_016845.1	1236286	1236381	-0.0131701	NC_016845.1	1236134	1236397	95	KPHS_11790	-0.404208
NC_016845.1	1236509	1236631	-0.0126677	NC_016845.1	1236397	1236579	70	KPHS_11800	-0.475909
NC_016845.1	1236509	1236631	-0.0126677	NC_016845.1	1236533	1237231	98	KPHS_11810	-0.56424
NC_016845.1	1239958	1240113	-0.0136643	NC_016845.1	1240086	1240304	27	KPHS_11860	0.134781
NC_016845.1	1288182	1288284	-0.0125503	NC_016845.1	1288282	1288358	2	KPHS_t00260	0.263368
NC_016845.1	1302288	1302682	-0.0161345	NC_016845.1	1302060	1302515	227	KPHS_12550	0.872875
NC_016845.1	1302288	1302682	-0.0161345	NC_016845.1	1302678	1303316	4	KPHS_12560	0.65392
NC_016845.1	1448987	1449407	-0.0139623	NC_016845.1	1448450	1449235	248	KPHS_13960	-0.0466333
NC_016845.1	1448987	1449407	-0.0139623	NC_016845.1	1449374	1450093	33	KPHS_13970	-0.279164
NC_016845.1	1450179	1450460	-0.0134495	NC_016845.1	1450141	1451256	281	KPHS_13980	-0.239233
NC_016845.1	1482478	1482675	-0.011509	NC_016845.1	1482405	1483340	197	KPHS_14310	0.0251477
NC_016845.1	1498694	1499163	-0.0135349	NC_016845.1	1497869	1498861	167	KPHS_14420	0.792388
NC_016845.1	1498694	1499163	-0.0135349	NC_016845.1	1498858	1499865	305	KPHS_14430	-0.0719044
NC_016845.1	1509373	1509789	-0.0145678	NC_016845.1	1507811	1509916	416	KPHS_14510	-0.117592
NC_016845.1	1536141	1536348	-0.0138747	NC_016845.1	1535224	1536228	87	KPHS_14760	-0.786741
NC_016845.1	1536141	1536348	-0.0138747	NC_016845.1	1536225	1537073	123	KPHS_14770	-1.29699
NC_016845.1	1548188	1548556	-0.0149488	NC_016845.1	1548137	1548886	368	KPHS_14870	0.0503594
NC_016845.1	1554336	1554676	-0.0128274	NC_016845.1	1553785	1555158	340	KPHS_14930	-0.223119
NC_016845.1	1571876	1572194	-0.0135881	NC_016845.1	1571279	1573861	318	KPHS_15130	-0.12606
NC_016845.1	1612455	1612717	-0.0141844	NC_016845.1	1612258	1612833	262	KPHS_15480	0.0323774
NC_016845.1	1619355	1619542	-0.0123457	NC_016845.1	1618795	1620273	187	KPHS_15530	-0.0175431
NC_016845.1	1623854	1623927	-0.0120264	NC_016845.1	1623696	1624421	73	KPHS_15580	-0.182239
NC_016845.1	1630239	1630563	-0.0144419	NC_016845.1	1629748	1631400	324	KPHS_15660	0.0304096
NC_016845.1	1631947	1632212	-0.0136833	NC_016845.1	1631416	1632132	185	KPHS_15680	0.0651715
NC_016845.1	1646188	1646512	-0.0156707	NC_016845.1	1645898	1647190	324	KPHS_15820	0.0954404
NC_016845.1	1663481	1663626	-0.0115242	NC_016845.1	1663069	1663842	145	KPHS_16010	-0.241968
NC_016845.1	1665620	1665710	-0.0118512	NC_016845.1	1665593	1666411	90	KPHS_16040	0.375212
NC_016845.1	1676330	1676686	-0.0135429	NC_016845.1	1676378	1677697	308	KPHS_16180	-0.028532
NC_016845.1	1723373	1723551	-0.0117586	NC_016845.1	1723344	1723610	178	KPHS_16640	-0.870561
NC_016845.1	1741501	1741710	-0.0133319	NC_016845.1	1741526	1743094	184	KPHS_16850	-0.174005
NC_016845.1	1761449	1761535	-0.0117367	NC_016845.1	1761230	1762150	86	KPHS_16980	0.0338005
NC_016845.1	1774350	1774490	-0.0143907	NC_016845.1	1774337	1775569	140	KPHS_17090	0.0614866
NC_016845.1	1775244	1775468	-0.014563	NC_016845.1	1774337	1775569	224	KPHS_17090	0.0614866
NC_016845.1	1777235	1777364	-0.0118544	NC_016845.1	1776419	1777621	129	KPHS_17110	-0.207953
NC_016845.1	1826305	1826485	-0.0140633	NC_016845.1	1825775	1826569	180	KPHS_17740	0.180094
NC_016845.1	1856876	1857068	-0.0120772	NC_016845.1	1856418	1860692	192	KPHS_18010	-0.20248
NC_016845.1	1912065	1912469	-0.0141131	NC_016845.1	1910975	1912213	148	KPHS_18440	0.00141109
NC_016845.1	1912065	1912469	-0.0141131	NC_016845.1	1912232	1913398	237	KPHS_18450	-0.201859
NC_016845.1	1952395	1952577	-0.0119338	NC_016845.1	1951866	1952486	91	KPHS_18810	0.0435996
NC_016845.1	1952395	1952577	-0.0119338	NC_016845.1	1952465	1952752	112	KPHS_18820	0.490154
NC_016845.1	1960564	1960857	-0.0148969	NC_016845.1	1960105	1961067	293	KPHS_18900	-0.247455
NC_016845.1	1987541	1987676	-0.0118037	NC_016845.1	1986696	1988204	135	KPHS_19190	-0.149681
NC_016845.1	1999124	1999528	-0.0246216	NC_016845.1	1999337	1999424	87	KPHS_t00740	-0.0433261
NC_016845.1	2004751	2004890	-0.012653	NC_016845.1	2003989	2005149	139	KPHS_19380	0.00921632
NC_016845.1	2055801	2055999	-0.0130943	NC_016845.1	2055636	2056577	198	KPHS_19940	0.226082
NC_016845.1	2062784	2062868	-0.012974	NC_016845.1	2062433	2063647	84	KPHS_19990	-0.0127126
NC_016845.1	2075660	2075885	-0.0137709	NC_016845.1	2074968	2076089	225	KPHS_20110	-0.232983
NC_016845.1	2123319	2123523	-0.0142642	NC_016845.1	2123277	2124158	204	KPHS_20700	0.413896
NC_016845.1	2127718	2127797	-0.0127957	NC_016845.1	2127468	2129402	79	KPHS_20760	-0.0644748
NC_016845.1	2147183	2147604	-0.0132888	NC_016845.1	2147366	2149219	238	KPHS_20960	-0.0282142
NC_016845.1	2147183	2147604	-0.0132888	NC_016845.1	2146208	2147227	44	KPHS_20950	0.14738
NC_016845.1	2167918	2168322	-0.0153458	NC_016845.1	2168070	2169290	252	KPHS_21180	-0.131438
NC_016845.1	2183805	2184177	-0.0129687	NC_016845.1	2183067	2185325	372	KPHS_21360	-0.391896
NC_016845.1	2194088	2194213	-0.0132807	NC_016845.1	2193920	2194663	125	KPHS_21460	0.238421
NC_016845.1	2194983	2195086	-0.0115117	NC_016845.1	2194689	2195006	23	KPHS_21470	0.517761
NC_016845.1	2237440	2237649	-0.0135569	NC_016845.1	2237507	2238664	142	KPHS_21920	-0.158693
NC_016845.1	2239033	2239504	-0.0149462	NC_016845.1	2238855	2239643	471	KPHS_21940	0.00642828
NC_016845.1	2285747	2286109	-0.0134788	NC_016845.1	2285568	2285762	15	KPHS_22440	-0.999586
NC_016845.1	2285747	2286109	-0.0134788	NC_016845.1	2285759	2286184	350	KPHS_22450	-0.0594056
NC_016845.1	2352030	2352434	-0.01457	NC_016845.1	2351655	2352740	404	KPHS_23180	0.669242
NC_016845.1	2367199	2367462	-0.0148461	NC_016845.1	2367179	2367847	263	KPHS_23380	-0.0431265
NC_016845.1	2383473	2383814	-0.0138122	NC_016845.1	2382297	2385824	341	KPHS_23530	-0.101913
NC_016845.1	2419325	2419777	-0.0139696	NC_016845.1	2418869	2420248	452	KPHS_23860	-0.09882
NC_016845.1	2445672	2446007	-0.0165793	NC_016845.1	2444770	2445798	126	KPHS_24140	0.0176105
NC_016845.1	2445672	2446007	-0.0165793	NC_016845.1	2445812	2446984	195	KPHS_24150	0.0482161
NC_016845.1	2468075	2468334	-0.0132997	NC_016845.1	2467790	2468740	259	KPHS_24360	0.138768
NC_016845.1	2475854	2476073	-0.0162297	NC_016845.1	2475393	2476301	219	KPHS_24430	0.335441
NC_016845.1	2476127	2476494	-0.0175384	NC_016845.1	2475393	2476301	174	KPHS_24430	0.335441
NC_016845.1	2476127	2476494	-0.0175384	NC_016845.1	2476403	2476966	91	KPHS_24440	0.103053
NC_016845.1	2490470	2490600	-0.0124045	NC_016845.1	2489250	2491031	130	KPHS_24560	0.704756
NC_016845.1	2520923	2521371	-0.014668	NC_016845.1	2520898	2521059	136	KPHS_24900	0.221912
NC_016845.1	2520923	2521371	-0.014668	NC_016845.1	2521061	2521678	310	KPHS_24910	0.942962
NC_016845.1	2557883	2558245	-0.0183934	NC_016845.1	2557968	2558408	277	KPHS_25310	0.632304
NC_016845.1	2572423	2572808	-0.0143588	NC_016845.1	2572420	2572854	385	KPHS_25480	0.35994
NC_016845.1	2597067	2597152	-0.0141359	NC_016845.1	2596837	2597217	85	KPHS_25750	-0.309063
NC_016845.1	2601755	2601900	-0.0125126	NC_016845.1	2601151	2602308	145	KPHS_25810	-0.0745235
NC_016845.1	2605349	2605697	-0.0149306	NC_016845.1	2604965	2605756	348	KPHS_25860	0.366714
NC_016845.1	2616870	2617046	-0.012752	NC_016845.1	2616250	2617629	176	KPHS_25980	0.25603
NC_016845.1	2653636	2654082	-0.0144574	NC_016845.1	2653749	2654138	333	KPHS_26380	-0.153798
NC_016845.1	2679674	2679744	-0.0137739	NC_016845.1	2679363	2680085	70	KPHS_26650	0.767831
NC_016845.1	2688900	2689378	-0.0146346	NC_016845.1	2688961	2689983	417	KPHS_26760	-0.0217356
NC_016845.1	2714943	2715242	-0.0127964	NC_016845.1	2714179	2715786	299	KPHS_27040	-0.00672044
NC_016845.1	2726118	2726304	-0.015253	NC_016845.1	2725461	2726300	182	KPHS_27160	0.188664
NC_016845.1	2727312	2727814	-0.0170174	NC_016845.1	2726480	2728066	502	KPHS_27170	0.0427958
NC_016845.1	2777706	2778182	-0.0193789	NC_016845.1	2777108	2778973	476	KPHS_27710	0.0516449
NC_016845.1	2814877	2815069	-0.0120477	NC_016845.1	2814707	2816404	192	KPHS_28140	-0.00739093
NC_016845.1	2823675	2823978	-0.0132826	NC_016845.1	2823238	2824860	303	KPHS_28240	0.230422
NC_016845.1	2843344	2843656	-0.013475	NC_016845.1	2843331	2844257	312	KPHS_28430	0.148165
NC_016845.1	2845425	2845618	-0.0138313	NC_016845.1	2844634	2845797	193	KPHS_28450	0.203929
NC_016845.1	2848801	2849098	-0.0133833	NC_016845.1	2848421	2848996	195	KPHS_28480	-0.0605503
NC_016845.1	2851588	2851935	-0.0167885	NC_016845.1	2850668	2854408	347	KPHS_28500	-0.373037
NC_016845.1	2854638	2854707	-0.0111846	NC_016845.1	2854405	2854932	69	KPHS_28510	-0.194605
NC_016845.1	2872835	2872928	-0.0126372	NC_016845.1	2872489	2873415	93	KPHS_28690	-0.0721524
NC_016845.1	2897829	2898027	-0.0123519	NC_016845.1	2897711	2897833	4	KPHS_28970	0.146204
NC_016845.1	2909082	2909455	-0.0118655	NC_016845.1	2909032	2909262	180	KPHS_29090	0.211582
NC_016845.1	2909082	2909455	-0.0118655	NC_016845.1	2909275	2911236	180	KPHS_29100	0.0174444
NC_016845.1	2909696	2910015	-0.0123433	NC_016845.1	2909275	2911236	319	KPHS_29100	0.0174444
NC_016845.1	2910112	2910241	-0.0120488	NC_016845.1	2909275	2911236	129	KPHS_29100	0.0174444
NC_016845.1	2914802	2915134	-0.0164288	NC_016845.1	2914395	2915291	332	KPHS_29160	0.00832985
NC_016845.1	2940458	2940916	-0.0162514	NC_016845.1	2940269	2940538	80	KPHS_29400	0.552277
NC_016845.1	2940458	2940916	-0.0162514	NC_016845.1	2940614	2941054	302	KPHS_29410	0.381983
NC_016845.1	2958822	2958980	-0.0124615	NC_016845.1	2958227	2959123	158	KPHS_29630	0.0101805
NC_016845.1	2959031	2959114	-0.0118677	NC_016845.1	2958227	2959123	83	KPHS_29630	0.0101805
NC_016845.1	2997382	2997911	-0.0193353	NC_016845.1	2997342	2998235	529	KPHS_30080	-0.201368
NC_016845.1	3006536	3006796	-0.0136949	NC_016845.1	3005705	3006694	158	KPHS_30160	-0.10161
NC_016845.1	3056470	3056725	-0.0127331	NC_016845.1	3055824	3057593	255	KPHS_30660	-0.281502
NC_016845.1	3061044	3061240	-0.0133683	NC_016845.1	3060325	3062535	196	KPHS_30700	0.105345
NC_016845.1	3111408	3111643	-0.0128679	NC_016845.1	3110472	3111692	235	KPHS_31220	-0.170419
NC_016845.1	3112328	3112412	-0.0117361	NC_016845.1	3111689	3112963	84	KPHS_31230	-0.160645
NC_016845.1	3140549	3140700	-0.0128375	NC_016845.1	3140586	3142964	114	KPHS_31520	-0.200294
NC_016845.1	3152451	3152745	-0.0134637	NC_016845.1	3151287	3152720	269	KPHS_31630	-0.19893
NC_016845.1	3175601	3175707	-0.0118864	NC_016845.1	3175373	3176281	106	KPHS_31890	-0.135409
NC_016845.1	3176894	3177035	-0.0118541	NC_016845.1	3176296	3177216	141	KPHS_31900	0.031839
NC_016845.1	3181496	3181700	-0.0122668	NC_016845.1	3180798	3183473	204	KPHS_31950	-0.141276
NC_016845.1	3183354	3183673	-0.0152689	NC_016845.1	3180798	3183473	119	KPHS_31950	-0.141276
NC_016845.1	3183354	3183673	-0.0152689	NC_016845.1	3183621	3184148	52	KPHS_31960	0.0219144
NC_016845.1	3191184	3191512	-0.013157	NC_016845.1	3191077	3191520	328	KPHS_32040	0.314242
NC_016845.1	3192014	3192278	-0.0147516	NC_016845.1	3191628	3192524	264	KPHS_32050	-0.159977
NC_016845.1	3257145	3257647	-0.0154205	NC_016845.1	3257035	3259521	502	KPHS_32730	0.0136868
NC_016845.1	3277957	3278378	-0.0149712	NC_016845.1	3277288	3278202	245	KPHS_32950	-0.10299
NC_016845.1	3277957	3278378	-0.0149712	NC_016845.1	3278312	3279370	66	KPHS_32960	-0.407791
NC_016845.1	3283667	3283750	-0.0128658	NC_016845.1	3283415	3284746	83	KPHS_33010	0.631855
NC_016845.1	3287257	3287688	-0.0142729	NC_016845.1	3287413	3287535	122	KPHS_33050	-0.132011
NC_016845.1	3287257	3287688	-0.0142729	NC_016845.1	3287573	3288373	115	KPHS_33060	0.00584391
NC_016845.1	3312519	3312749	-0.0124733	NC_016845.1	3312479	3313177	230	KPHS_33310	0.165213
NC_016845.1	3329150	3329292	-0.0125609	NC_016845.1	3328838	3329809	142	KPHS_33470	-0.0334935
NC_016845.1	3339567	3339935	-0.0140402	NC_016845.1	3338671	3340092	368	KPHS_33600	0.167713
NC_016845.1	3341707	3341919	-0.0126492	NC_016845.1	3341278	3343326	212	KPHS_33620	-0.127311
NC_016845.1	3356270	3356328	-0.0116166	NC_016845.1	3356182	3356631	58	KPHS_33780	-0.20158
NC_016845.1	3371512	3371896	-0.0151665	NC_016845.1	3371392	3372111	384	KPHS_33940	-0.13944
NC_016845.1	3420070	3420601	-0.0146406	NC_016845.1	3419753	3420664	531	KPHS_34460	-0.161608
NC_016845.1	3495725	3495947	-0.0150155	NC_016845.1	3495637	3495780	55	KPHS_34970	1.64853
NC_016845.1	3495725	3495947	-0.0150155	NC_016845.1	3495799	3497433	148	KPHS_34980	0.365334
NC_016845.1	3579990	3580465	-0.0151907	NC_016845.1	3579933	3580562	475	KPHS_35730	0.0489047
NC_016845.1	3589627	3589953	-0.0140143	NC_016845.1	3588725	3590176	326	KPHS_35800	0.361534
NC_016845.1	3594747	3594903	-0.0133706	NC_016845.1	3594417	3595649	156	KPHS_35850	-0.466171
NC_016845.1	3599407	3599471	-0.0123839	NC_016845.1	3597230	3600352	64	KPHS_35870	-0.290809
NC_016845.1	3640035	3640372	-0.0163446	NC_016845.1	3638887	3640800	337	KPHS_36230	0.0709366
NC_016845.1	3640429	3640531	-0.0147416	NC_016845.1	3638887	3640800	102	KPHS_36230	0.0709366
NC_016845.1	3646204	3646524	-0.0130265	NC_016845.1	3645809	3646966	320	KPHS_36300	-0.360434
NC_016845.1	3655158	3655264	-0.0112386	NC_016845.1	3655009	3655578	106	KPHS_36370	-0.244452
NC_016845.1	3681428	3682113	-0.0216286	NC_016845.1	3681398	3682447	685	KPHS_36610	0.172197
NC_016845.1	3695854	3696142	-0.0171391	NC_016845.1	3695346	3696059	205	KPHS_36730	0.247482
NC_016845.1	3696581	3697069	-0.0160648	NC_016845.1	3696666	3697055	389	KPHS_36740	0.358631
NC_016845.1	3700926	3700989	-0.0109672	NC_016845.1	3700690	3701784	63	KPHS_36770	-0.181059
NC_016845.1	3719070	3719345	-0.0134044	NC_016845.1	3718514	3720148	275	KPHS_36940	0.0988581
NC_016845.1	3765793	3766098	-0.0132274	NC_016845.1	3764710	3765999	206	KPHS_37300	-0.0855073
NC_016845.1	3778886	3779042	-0.0120712	NC_016845.1	3777785	3779122	156	KPHS_37410	-0.0742893
NC_016845.1	3810140	3810437	-0.0124826	NC_016845.1	3809855	3810514	297	KPHS_37760	-0.0244944
NC_016845.1	3830686	3830900	-0.0119867	NC_016845.1	3830691	3831137	209	KPHS_37960	-0.0190964
NC_016845.1	3842835	3842913	-0.0114815	NC_016845.1	3842604	3843569	78	KPHS_38100	0.220268
NC_016845.1	3849417	3849557	-0.0119052	NC_016845.1	3848447	3849625	140	KPHS_38150	-0.182561
NC_016845.1	3891240	3891359	-0.0158148	NC_016845.1	3889991	3891394	119	KPHS_38590	-0.160305
NC_016845.1	3891432	3891673	-0.0145686	NC_016845.1	3891406	3891693	241	KPHS_38600	-0.873175
NC_016845.1	3892937	3893292	-0.0130886	NC_016845.1	3892151	3893167	230	KPHS_38620	0.0313684
NC_016845.1	3892937	3893292	-0.0130886	NC_016845.1	3893157	3893963	135	KPHS_38630	-0.540612
NC_016845.1	3901854	3902240	-0.0178229	NC_016845.1	3901773	3902249	386	KPHS_38710	0.206853
NC_016845.1	3906318	3906703	-0.0148599	NC_016845.1	3905323	3908436	385	KPHS_38740	-0.1054
NC_016845.1	3931397	3931546	-0.0136162	NC_016845.1	3930280	3932340	149	KPHS_38990	-0.0799423
NC_016845.1	3938412	3938923	-0.0138808	NC_016845.1	3937784	3939016	511	KPHS_39040	-0.146564
NC_016845.1	3939467	3939568	-0.011361	NC_016845.1	3939421	3940488	101	KPHS_39050	-0.598007
NC_016845.1	3944068	3944323	-0.0121316	NC_016845.1	3944080	3944472	243	KPHS_39080	0.079288
NC_016845.1	3991505	3991752	-0.0152237	NC_016845.1	3991509	3992699	243	KPHS_39480	0.0181138
NC_016845.1	3991820	3991934	-0.0139352	NC_016845.1	3991509	3992699	114	KPHS_39480	0.0181138
NC_016845.1	4007871	4007969	-0.0114753	NC_016845.1	4007376	4008281	98	KPHS_39620	-0.0809578
NC_016845.1	4026503	4026711	-0.0141927	NC_016845.1	4025877	4027232	208	KPHS_39800	-0.0533319
NC_016845.1	4049657	4049864	-0.0142788	NC_016845.1	4049297	4049755	98	KPHS_39980	0.292993
NC_016845.1	4049657	4049864	-0.0142788	NC_016845.1	4049745	4049882	119	KPHS_39990	#VALUE!
NC_016845.1	4092303	4092397	-0.0109539	NC_016845.1	4092010	4092765	94	KPHS_40530	-0.140395
NC_016845.1	4095169	4095225	-0.0125466	NC_016845.1	4094565	4096226	56	KPHS_40560	-0.266471
NC_016845.1	4120511	4120828	-0.0119539	NC_016845.1	4119624	4120796	285	KPHS_40890	-0.115079
NC_016845.1	4120511	4120828	-0.0119539	NC_016845.1	4120812	4122350	16	KPHS_40900	-0.179395
NC_016845.1	4170221	4170623	-0.0263637	NC_016845.1	4169768	4171825	402	KPHS_41420	-0.205677
NC_016845.1	4176131	4177013	-0.0194148	NC_016845.1	4175535	4176872	741	KPHS_41450	0.126363
NC_016845.1	4182792	4182958	-0.011881	NC_016845.1	4182732	4183649	166	KPHS_41530	0.248757
NC_016845.1	4185105	4185227	-0.0132322	NC_016845.1	4184464	4185312	122	KPHS_41550	0.200364
NC_016845.1	4188851	4189108	-0.0155053	NC_016845.1	4188685	4190394	257	KPHS_41600	0.411834
NC_016845.1	4208185	4208401	-0.0120213	NC_016845.1	4207469	4208461	216	KPHS_41780	0.332888
NC_016845.1	4225747	4225848	-0.0130205	NC_016845.1	4225132	4225803	56	KPHS_41970	-0.185091
NC_016845.1	4349034	4349111	-0.011822	NC_016845.1	4348398	4349171	77	KPHS_43130	-0.0326641
NC_016845.1	4350113	4350279	-0.0132823	NC_016845.1	4349239	4350666	166	KPHS_43140	0.0379997
NC_016845.1	4358758	4358999	-0.0130277	NC_016845.1	4358111	4359013	241	KPHS_43220	-0.0300244
NC_016845.1	4385139	4385282	-0.0124549	NC_016845.1	4384709	4385317	143	KPHS_43470	0.932948
NC_016845.1	4428673	4429162	-0.0132598	NC_016845.1	4427768	4428751	78	KPHS_43940	0.140602
NC_016845.1	4428673	4429162	-0.0132598	NC_016845.1	4428902	4429561	260	KPHS_43950	0.0237013
NC_016845.1	4429232	4429390	-0.011989	NC_016845.1	4428902	4429561	158	KPHS_43950	0.0237013
NC_016845.1	4450423	4450475	-0.0109727	NC_016845.1	4450087	4450980	52	KPHS_44150	-0.400088
NC_016845.1	4454575	4454784	-0.0152183	NC_016845.1	4453726	4454805	209	KPHS_44200	-0.0188073
NC_016845.1	4454864	4455046	-0.0177231	NC_016845.1	4454903	4456066	143	KPHS_44210	0.154247
NC_016845.1	4463429	4463938	-0.0127751	NC_016845.1	4462331	4463971	509	KPHS_44260	-0.1024
NC_016845.1	4474066	4474305	-0.0115209	NC_016845.1	4473385	4474407	239	KPHS_44370	0.115497
NC_016845.1	4475733	4475837	-0.0115205	NC_016845.1	4475474	4476694	104	KPHS_44400	0.170611
NC_016845.1	4538819	4538907	-0.0124928	NC_016845.1	4538363	4539010	88	KPHS_45110	-0.588272
NC_016845.1	4557963	4558396	-0.0165676	NC_016845.1	4557830	4558702	433	KPHS_45310	0.0341111
NC_016845.1	4581752	4581855	-0.0112842	NC_016845.1	4581019	4581918	103	KPHS_45570	-0.0218757
NC_016845.1	4590003	4590174	-0.0125373	NC_016845.1	4589603	4591861	171	KPHS_45640	0.0501633
NC_016845.1	4591950	4592178	-0.012411	NC_016845.1	4591983	4592852	195	KPHS_45650	-0.031249
NC_016845.1	4598902	4598959	-0.0111039	NC_016845.1	4598563	4599138	57	KPHS_45720	-0.217571
NC_016845.1	4625905	4626129	-0.0140143	NC_016845.1	4625401	4626414	224	KPHS_46030	0.114451
NC_016845.1	4679404	4679925	-0.014774	NC_016845.1	4679232	4680644	521	KPHS_46530	-0.0400913
NC_016845.1	4708111	4708284	-0.0135366	NC_016845.1	4706967	4708349	173	KPHS_46870	0.16148
NC_016845.1	4714851	4714939	-0.0120899	NC_016845.1	4714780	4715370	88	KPHS_46940	0.308772
NC_016845.1	4771422	4771587	-0.0118363	NC_016845.1	4771216	4772280	165	KPHS_47590	-0.0593398
NC_016845.1	4795820	4796268	-0.013811	NC_016845.1	4795688	4796620	448	KPHS_47810	-0.119669
NC_016845.1	4814168	4814424	-0.0151459	NC_016845.1	4813484	4814833	256	KPHS_47970	-0.0324295
NC_016845.1	4884901	4885025	-0.0119887	NC_016845.1	4883885	4885789	124	KPHS_48880	0.132021
NC_016845.1	4895917	4896150	-0.012244	NC_016845.1	4895273	4896460	233	KPHS_49010	-0.221449
NC_016845.1	4907641	4907854	-0.0124841	NC_016845.1	4907207	4908190	213	KPHS_49120	-0.0650497
NC_016845.1	4974552	4974902	-0.0139032	NC_016845.1	4974421	4975188	350	KPHS_49700	0.0466163
NC_016845.1	5000721	5000997	-0.012996	NC_016845.1	4999278	5000933	212	KPHS_49980	-0.0499808
NC_016845.1	5000721	5000997	-0.012996	NC_016845.1	5000933	5001835	64	KPHS_49990	-0.227623
NC_016845.1	5027577	5027947	-0.0125986	NC_016845.1	5027384	5028046	370	KPHS_50220	-0.0381181
NC_016845.1	5036568	5036901	-0.0161798	NC_016845.1	5036356	5038407	333	KPHS_50300	-0.106238
NC_016845.1	5057042	5057299	-0.0119522	NC_016845.1	5055642	5057195	153	KPHS_50430	0.207852
NC_016845.1	5057042	5057299	-0.0119522	NC_016845.1	5057195	5057392	104	KPHS_50440	0.169193
NC_016845.1	5086362	5086661	-0.012352	NC_016845.1	5085867	5088197	299	KPHS_50670	-0.0614023
NC_016845.1	5091930	5092022	-0.011459	NC_016845.1	5091012	5091947	17	KPHS_50720	-0.350951
NC_016845.1	5146098	5146363	-0.0131214	NC_016845.1	5145914	5146846	265	KPHS_51220	0.151413
NC_016845.1	5182136	5182242	-0.0121433	NC_016845.1	5181788	5183908	106	KPHS_51640	-0.0118088
NC_016845.1	5211135	5211262	-0.0128579	NC_016845.1	5211106	5212113	127	KPHS_51880	0.158674
NC_016845.1	5220598	5220774	-0.0127899	NC_016845.1	5220439	5220909	176	KPHS_51990	-0.224687
NC_016845.1	5223096	5223359	-0.0135777	NC_016845.1	5222545	5224038	263	KPHS_52020	-0.153876
NC_016845.1	5243103	5243297	-0.012401	NC_016845.1	5243007	5244377	194	KPHS_52220	0.041632
NC_016845.1	5246829	5247029	-0.0129524	NC_016845.1	5246150	5247472	200	KPHS_52250	0.394837
NC_016845.1	5249066	5249193	-0.0121264	NC_016845.1	5248017	5249396	127	KPHS_52270	0.0105096
NC_016845.1	5289911	5290540	-0.0156861	NC_016845.1	5290062	5291195	478	KPHS_52720	-0.000249137
NC_016845.1	5327988	5328210	-0.0126005	NC_016845.1	5326582	5328123	135	KPHS_53090	0.0462085
NC_016845.1	5327988	5328210	-0.0126005	NC_016845.1	5328136	5328669	74	KPHS_53100	0.331503
NC_016845.1	5329075	5329561	-0.017386	NC_016845.1	5328684	5329154	79	KPHS_53110	0.366699
NC_016845.1	5329075	5329561	-0.017386	NC_016845.1	5329205	5329444	239	KPHS_53120	0.414484
NC_016845.1	5329075	5329561	-0.017386	NC_016845.1	5329494	5330309	67	KPHS_53130	0.291663
